# Supplementary material for: Taxonomic and functional microbiota changes in dysenteric colitis produced by Brachyspira hyodysenteriae in pigs
Source: Research Square preprint supplement (doi:10.21203/rs.3.rs-5979918/v1), 2025-03-17
Supplement: Supplementary file 1 [file 0df80d302347084d339c73c3.docx]

**Additional file 12** Analysis of influence of *Brachyspira hyodysenteriae* “Shedding_onset”, mucohaemorrhagic diarrhoea onset (“Dysentery_onset”) and “Euthanasia_day” on the ordination of samples.

| Factor | Early_inf | | | | Factor | Acute_inf | | | |
| --- | --- | --- | --- | --- | --- | --- | --- | --- | --- |
| NMDS | | PCoA | | NMDS | | PCoA | |
| R2 | P value | R2 | P value | R2 | P value | R2 | P value |
| Species composition | | | | | | | | | |
| Shedding_onset | 0.0632 | 0.404 | 0.0550 | 0.461 | Dysentery_onset | 0.3047 | 0.004** | 0.3193 | 0.003** |
| Euthanasia_day | 0.0935 | 0.286 | 0.3947 | 0.001*** | Euthanasia_day | 0.0930 | 0.290 | 0.1361 | 0.139 |
| Functional level | | | | | | | | | |
| Shedding_onset | 0.0334 | 0.604 | 0.0328 | 0.613 | Dysentery_onset | 0.2179 | 0.033* | 0.2122 | 0.028* |
| Euthanasia_day | 0.2417 | 0.025* | 0.2264 | 0.023* | Euthanasia_day | 0.1617 | 0.081 | 0.1956 | 0.048* |

* P ≤ 0.05, ** P ≤ 0.01, *** P≤ 0.001, **** P ≤ 0.0001
