# Supplementary material for: Taxonomic and functional microbiota changes in dysenteric colitis produced by Brachyspira hyodysenteriae in pigs
Source: Research Square preprint supplement (doi:10.21203/rs.3.rs-5979918/v1), 2025-03-17
Supplement: Supplementary file 2 [file 254e5b183e042fb0c9818cc5.docx]

**Additional file 11** Results of the multivariate permutational analysis of variance in the Bray-Curtis distances of the cluster ordination.

| Factor | | | Faeces | | Colon_content | | Mucosa | |
| --- | --- | --- | --- | --- | --- | --- | --- | --- |
| R2 | P value | R2 | P value | R2 | P value |
| Cluster | |  | 0.11465 | 0.001 *** | 0.20366 | 0.001 *** | 0.29668 | 0.001 *** |
|  | 1 vs 2 | | 0.11465 | 0.001 *** | 0.30545 | 0.003 ** | 0.28595 | 0.003 ** |
|  | 1 vs 3 | |  |  | 0.24578 | 0.003 ** | 0.42586 | 0.003 ** |
|  | 2 vs 3 | |  |  | 0.25274 | 0.003 ** | 0.50710 | 0.003 ** |

* P ≤ 0.05, ** P ≤ 0.01, *** P≤ 0.001, **** P ≤ 0.0001
