# Supplementary material for: Taxonomic and functional microbiota changes in dysenteric colitis produced by Brachyspira hyodysenteriae in pigs
Source: Research Square preprint supplement (doi:10.21203/rs.3.rs-5979918/v1), 2025-03-17
Supplement: Supplementary file 3 [file 282bb96b29469ce3c5bdd9d8.docx]

**Additional file 15** Detailed information of the MAGs obtained in the study.

The 112 metagenomic samples binned into a total of 3735 MAGs, of which 969 were classified as high-quality (> 90 % completeness; < 5 % contamination) and 1696 as medium-quality (≥ 50 % completeness; < 10 % contamination) according to Bowers et al. (2017) [1] criteria. Most of the sequences were identified to species level agaist the GTDB database (819 HQ MAG and 1198 MQ MAGs).

MAGs identified as species of interest were selected for further studies: 7 MAGs (4 HQ; 3 MQ) were identifed to species level as *Acetivibrio ethanolgignensis* from Early_inf and Acute_inf. Likewise, 4 MAGs (1 HQ; 3 MQ) from Early_inf and Acute_inf samples were identified as *Campylobacter hyointestinalis* whereas only 1 HQ MAG (Acute_inf) was identified as *Roseburia inulinivorans* and 2 MQ MAGs (Early_inf) as *Prevotella copri* clade A. On the other hand, 16 MAGs (10 HQ; 6 MQ) as *Alloprevotella* sp004552155, 12 MAGs (1 HQ; 11 MQ) as *Prevotella pectinovora*, 38 MQ MAGs as *Prevotella* sp900322035 and 15 MQ MAG *Prevotella* sp900546535 from Control, Early_inf and Acute_inf samples (Additional file 12).

The phylogenomy based on BAC120 bacterial markers integrated in GTDB-tk tool revealed that the 7 MAGs identified as *A. ethanolgignens* clustered with type strain of this species, *A. ethanolgignens* ATCC 33324T. However, this cluster habours a closer genomic relationship with the genus *Velocimicrobium* (family *Lachnospiraceae*) than with the other species constituting the genus *Acetivibrio* (family *Oscillospiraceae*) (Figure 8 A), suggesting that the species *A. ethanolgignens* may be constituting an independent genus within the family *Lachnospiraceae* as proposed by Zou et al. (2021) [2]. Regarding the 4 MAGs identified as *C. hyointestinalis*, they exhibited a closer relationship with *C. hyointestinalis* subsp. *hyointestinalis* CCUG 14169T than with *C. hyointestinalis* subsp. *lawsonii* CHY5T (Figure 8 B). The MAGs identified as *R. inulinivorans*, *Alloprevotella* sp900546535 and members of the genus *Prevotella* clustered with the type strain of species of their respective species (Figure 8 C and D).

The functional profile of MAGs identified as species *Campylobacter hyointestinalis* and *Acetivibrio ethanolgignensis,* which were exclusively found in metagenomes from Early_inf and Acute_inf samples, was studied based on KEGG identifiers. Most functions were related to membrane transport (ABC transporters), signal transduction (two-component system), genetic information processing (ribosome), nucleotide metabolism (purine metabolism), cell motility (flagellar assembly) and cellular community (quorum sensing) (Figure 9). Among the ABC transport functions, *afuABC* (K02010, K02011, K02012) and *modABC* (K02017, K02018, K02020) for iron and molybdate transport system were identified for both taxa. In the case of MAGs identified as *Acetivibrio ethanolgignensis*, *oppABCD* (K15580, K15581, K15582, K15583) genes for oligopeptide transport system were annotated. Last, bacitracin and antibiotic transport system (K19083, K19084, K19309, K19310; K20459, K20461) have been annotated in some of the HQ and MQ MAGs identified as *Acetivibrio ethanolgignensis*.

Virulence factors and AMR genes search found the *nimJ* (5’-nitroimidazole reductosa) gen in 5 MAGs identified as *Prevotella* sp900546535 with 91.19 % identity and 96.36 % alignment coverage. Regarding *Acetivibrio ethanolgignens*, one HQ MAG presented 99.1 % identity (99.26 % alignment coverage) for macrolide efflux MFS transporter Mef(A). Besides, *cfxA*, *tet(44)* and *cfr(E)* AMR genes were found with 99.38, 98.12 and 100.00 % identity (100.00 % alignment coverage), respectively, for one MQ MAG. MAGs identified as *Alloprevotella* sp004552155, *Campylobacter hyointestinalis*, *Prevotella copri* clade A, *Prevotella* sp900546535 and *Roseburia inulinivorans* did not present any AMR genes nor virulence factor.

**References**

1. Bowers RM, Kyrpides NC, Stepanauskas R, Harmon-Smith M, Doud D, Reddy TBK, et al. Minimum information about a single amplified genome (MISAG) and a metagenome-assembled genome (MIMAG) of bacteria and archaea. Nat Biotechnol. 2017;35:725–31. doi : 10.1038/nbt.3893.

2. Zou Y, Xue W, Lin X, Lv M, Luo G, Dai Y, et al. *Butyribacter intestini* gen. nov., sp. nov., a butyric acid-producing bacterium of the family *Lachnospiraceae* isolated from human faeces, and reclassification of *Acetivibrio ethanolgignens* as *Acetanaerobacter ethanolgignens* gen. nov., comb. nov. Syst Appl Microbiol. 2021;44. doi: 10.1016/j.syapm.2021.126201.
