# Supplementary material for: Taxonomic and functional microbiota changes in dysenteric colitis produced by Brachyspira hyodysenteriae in pigs
Source: Research Square preprint supplement (doi:10.21203/rs.3.rs-5979918/v1), 2025-03-17
Supplement: Supplementary file 4 [file 31c3594e3e0374322855b65d.docx]

**Additional file 3** Results of the multivariate permutational analysis of variance in the Bray-Curtis distances of the ordination.

| Factor | | | Global | | | | Euthanasia Before_day_25 | | | | Euthanasia After_day_25 | | | | Faeces | | | | Colon_content | | | | |
| --- | --- | --- | --- | --- | --- | --- | --- | --- | --- | --- | --- | --- | --- | --- | --- | --- | --- | --- | --- | --- | --- | --- | --- |
| R2 | | P value | | R2 | | P value | | R2 | | P value | | R2 | | P value | | R2 | | P value | | |
| Species composition | | | | | | | | | | | | | | | | | | | | | | | |
| Sample_type | |  | | 0.01867 | | 0.106 | | 0.02517 | | 0.267 | | 0.02131 | | 0.784 | |  | |  | |  | |  | |
| Infection | |  | | 0.06981 | | 0.001 *** | | 0.06321 | | 0.001 *** | | 0.19910 | | 0.001 *** | | 0.06789 | | 0.002 ** | | 0.08525 | | 0.001 *** | |
| Group | |  | | 0.09070 | | 0.001 *** | | 0.12412 | | 0.001 *** | | 0.13572 | | 0.001 *** | | 0.08578 | | 0.001 *** | | 0.11179 | | 0.001 *** | |
|  | Control vs Early_inf | | | 0.03758 | | 0.207 | | 0.04514 | | 0.501 | | 0.23381 | | 0.003 ** | | 0.05091 | | 0.798 | | 0.03589 | | 1.000 | |
|  | Control vs Acute_inf | | | 0.16290 | | 0.003 ** | | 0.18785 | | 0.003 ** | | 0.28829 | | 0.003 ** | | 0.14630 | | 0.003 ** | | 0.20522 | | 0.003 ** | |
|  | Early_inf vs Acute_inf | | | 0.17667 | | 0.003 ** | | 0.24956 | | 0.003 ** | | 0.24867 | | 0.012 * | | 0.16970 | | 0.003 ** | | 0.21620 | | 0.009 ** | |
| Euthanasia_day | |  | | 0.10663 | | 0.001 *** | |  | |  | |  | |  | | 0.09158 | | 0.001 *** | | 0.01323 | | 0.001 *** | |
| Functional level | | | | | | | | | | | | | | | | | | | | | | | |
| Sample_type | |  | | 0.01593 | | 0.195 | | 0.02267 | | 0.432 | | 0.03439 | | 0.357 | |  | |  | |  | |  | |
| Infection | |  | | 0.05195 | | 0.001 *** | | 0.05130 | | 0.048 * | | 0.21162 | | 0.001 *** | | 0.05714 | | 0.054 | | 0.06564 | | 0.015 * | |
| Group | |  | | 0.07173 | | 0.001 *** | | 0.08490 | | 0.005 ** | | 0.10988 | | 0.010 ** | | 0.09400 | | 0.005 ** | | 0.07711 | | 0.011 * | |
|  | Control vs Early_inf | | | 0.02075 | | 1.000 | | 0.02379 | | 1.000 | | 0.16000 | | 0.186 | | 0.03855 | | 1.000 | | 0.01989 | | 1.000 | |
|  | Control vs Acute_inf | | | 0.12746 | | 0.003 ** | | 0.14452 | | 0.003 ** | | 0.30608 | | 0.063 | | 0.14456 | | 0.012 * | | 0.14989 | | 0.009 ** | |
|  | Early_inf vs Acute_inf | | | 0.14188 | | 0.003 ** | | 0.16782 | | 0.027 * | | 0.21671 | | 0.003 ** | | 0.18861 | | 0.042 * | | 0.15154 | | 0.078 | |
| Euthanasia_day | |  | | 0.18818 | | 0.001 *** | |  | |  | |  | |  | | 0.14549 | | 0.001 *** | | 0.25632 | | 0.001 *** | |
| Mucosa species composition | | | | | | | | | | | | | | | | | | | | | | | |
| Infection | |  | | 0.14762 | | 0.001 *** | | 0.20460 | | 0.001 *** | | 0.20832 | | 0.004 ** | |  | |  | |  | |  |
| Group | |  | | 0.09829 | | 0.002 ** | | 0.11365 | | 0.028 * | | 0.19239 | | 0.016 * | |  | |  | |  | |  |
|  | Control vs Early_inf | | | 0.05340 | | 0.744 | | 0.11642 | | 0.126 | | 0.20762 | | 0.342 | |  | |  | |  | |  |
|  | Control vs Acute_inf | | | 0.29846 | | 0.003 ** | | 0.41764 | | 0.003 ** | | 0.35274 | | 0.009 ** | |  | |  | |  | |  |
|  | Early_inf vs Acute_inf | | | 0.18436 | | 0.093 | | 0.20681 | | 0.450 | | 0.36097 | | 0.400 | |  | |  | |  | |  |
| Euthanasia_day | |  | | 0.10861 | | 0.002 ** | |  | |  | |  | |  | |  | |  | |  | |  |

* P ≤ 0.05, ** P ≤ 0.01, *** P≤ 0.001, **** P ≤ 0.0001
