# Supplementary material for: Taxonomic and functional microbiota changes in dysenteric colitis produced by Brachyspira hyodysenteriae in pigs
Source: Research Square preprint supplement (doi:10.21203/rs.3.rs-5979918/v1), 2025-03-17
Supplement: Supplementary file 5 [file d929b4c4ac1a92532ff80951.docx]

**Additional file 13** Results of the multivariate permutational analysis of variance in the Bray-Curtis distances of the ordination according to *Brachyspira hyodysenteriae* “Shedding_onset”, mucohaemorrhagic diarrhoea onset (“Dysentery_onset”) and “Euthanasia_day”.

| Factor | Early_inf | | Factor | Acute_inf | |
| --- | --- | --- | --- | --- | --- |
| R2 | P value | R2 | P value |
| Species composition | | | | | |
| Shedding_onset | 0.0587 | 0.452 | Dysentery_onset | 0.1537 | 0.005** |
| Euthanasia_day | 0.1953 | 0.001*** | Euthanasia_day | 0.1176 | 0.023* |
| Functional level | | | | | |
| Shedding_onset | 0.0375 | 0.653 | Dysentery_onset | 0.1802 | 0.016* |
| Euthanasia_day | 0.2063 | 0.024* | Euthanasia_day | 0.1685 | 0.030* |

* P ≤ 0.05, ** P ≤ 0.01, *** P≤ 0.001, **** P ≤ 0.0001
