# Supplementary material for: Taxonomic and functional microbiota changes in dysenteric colitis produced by Brachyspira hyodysenteriae in pigs
Source: Research Square preprint supplement (doi:10.21203/rs.3.rs-5979918/v1), 2025-03-17
Supplement: Supplementary file 6 [file ea33dc4e2f2d48090b6d47b8.docx]

**Additional file 2** Analysis of influence of different factors on the ordination of samples.

| Factor | Global | | | | Euthanasia Before_day_25 | | | | Euthanasia After_day_25 | | | | Faeces | | | | Colon_content | | | |
| --- | --- | --- | --- | --- | --- | --- | --- | --- | --- | --- | --- | --- | --- | --- | --- | --- | --- | --- | --- | --- |
| NMDS | | PCoA | | NMDS | | PCoA | | NMDS | | PCoA | | NMDS | | PCoA | | NMDS | | PCoA | |
| R2 | P value | R2 | P value | R2 | P value | R2 | P value | R2 | P value | R2 | P value | R2 | P value | R2 | P value | R2 | P value | R2 | P value |
| Species composition | | | | | | | | | | | | | | | | | | | | |
| Sample_type | 0.0327 | 0.125 | 0.0146 | 0.395 | 0.0288 | 0.342 | 0.0187 | 0.528 | 0.0142 | 0.711 | 0.0201 | 0.629 |  |  |  |  |  |  |  |  |
| Infection | 0.1184 | 0.001 *** | 0.1503 | 0.001 *** | 0.1066 | 0.004 ** | 0.1017 | 0.010 ** | 0.1689 | 0.021 * | 0.5020 | 0.001 *** | 0.0826 | 0.055 | 0.1272 | 0.015 * | 0.1703 | 0.005 ** | 0.1816 | 0.001 *** |
| Group | 0.3260 | 0.001 *** | 0.3690 | 0.001 *** | 0.3333 | 0.001 *** | 0.3856 | 0.001 *** | 0.5080 | 0.001 *** | 0.6883 | 0.001 *** | 0.2865 | 0.001 *** | 0.3255 | 0.001 *** | 0.4080 | 0.001 *** | 0.4290 | 0.001 *** |
| Euthanasia_day | 0.0098 | 0.571 | 0.1721 | 0.004 ** |  |  |  |  |  |  |  |  | 0.0092 | 0.763 | 0.1688 | 0.005 ** | 0.0083 | 0.790 | 0.1818 | 0.003 ** |
| Functional level | | | | | | | | | | | | | | | | | | | | |
| Sample_type | 0.0049 | 0.744 | 0.0061 | 0.682 | 0.0042 | 0.844 | 0.0100 | 0.679 | 0.0299 | 0.476 | 0.0458 | 0.319 |  |  |  |  |  |  |  |  |
| Infection | 0.0148 | 0.393 | 0.0128 | 0.415 | 0.0618 | 0.095 | 0.0151 | 0.574 | 0.2934 | 0.002 ** | 0.2278 | 0.019 * | 0.0286 | 0.440 | 0.0154 | 0.666 | 0.0394 | 0.305 | 0.0241 | 0.467 |
| Group | 0.0806 | 0.028 * | 0.0743 | 0.036 * | 0.1280 | 0.034 * | 0.0535 | 0.410 | 0.4355 | 0.001 *** | 0.2557 | 0.043 * | 0.1495 | 0.041 * | 0.1125 | 0.133 | 0.1265 | 0.080 | 0.0814 | 0.289 |
| Euthanasia_day | 0.3068 | 0.001 *** | 0.3298 | 0.001 *** |  |  |  |  |  |  |  |  | 0.2449 | 0.001 *** | 0.2465 | 0.001 *** | 0.3875 | 0.001 *** | 0.4448 | 0.001 *** |
| Mucosa species composition | | | | | | | | | | | | | | | | | | | | |
| Infection | 0.2325 | 0.002 ** | 0.2284 | 0.003 ** | 0.2833 | 0.003 ** | 0.3180 | 0.002 ** | 0.3224 | 0.026 * | 0.2570 | 0.062 |  |  |  |  |  |  |  |  |
| Group | 0.4016 | 0.001 *** | 0.3831 | 0.001 *** | 0.4211 | 0.009 ** | 0.4934 | 0.003 ** | 0.6274 | 0.020 * | 0.5837 | 0.016 * |  |  |  |  |  |  |  |  |
| Euthanasia_day | 0.1284 | 0.026 * | 0.1714 | 0.009 ** |  |  |  |  |  |  |  |  |  |  |  |  |  |  |  |  |

* P ≤ 0.05, ** P ≤ 0.01, *** P≤ 0.001, **** P ≤ 0.0001
